# Supplementary material
Source: Elsevier journal article supplement (https://comptes-rendus.academie-sciences.fr/biologies/article/10.1016/j.crvi.2008.04.006/file/attach/mmc1.pdf)
Supplement: mmc1 [file mmc1.pdf]

## APPENDIX 1

List of species and their abundances in each plot Nègreiron, Termes Blancs, Peau de Meau and Merle (G = Grazed area; X = enclosure; Troph = trophic groups: Phy = Phytophagous; Prd = predators; Sap = Saprophagous ; Cop = Coprophagous ; ° = interesting species for beetle conservation)

| FAMILIES             | SPECIES                                                   | Total | Termes Blancs |    |              |   |       |    |               |    | Troph |
|----------------------|-----------------------------------------------------------|-------|---------------|----|--------------|---|-------|----|---------------|----|-------|
|                      |                                                           |       | Nègreiron     |    | Peau de Meau |   | Merle |    | Termes Blancs |    |       |
|                      |                                                           |       | G             | X  | G            | X | G     | X  | G             | X  |       |
| <b>Anobiidae</b>     | <i>Dignomus</i> sp.                                       | 4     | 0             | 0  | 0            | 0 | 0     | 1  | 3             | 0  | sap   |
|                      | <i>Lasioderma</i> sp.2                                    | 2     | 0             | 1  | 0            | 0 | 0     | 1  | 0             | 0  | sap   |
|                      | <i>Ptinus bidens</i> Olivier 1790                         | 1     | 0             | 0  | 0            | 0 | 0     | 0  | 0             | 1  | sap   |
|                      | <i>Ptinus</i> sp.                                         | 1     | 0             | 0  | 0            | 0 | 0     | 1  | 0             | 0  | sap   |
| <b>Anthicidae</b>    | <i>Anthicus tristis</i> W. L. E. Schmidt 1842             | 42    | 0             | 3  | 0            | 0 | 0     | 0  | 28            | 11 | sap   |
|                      | <i>Endomia tenuicollis</i> (Rossi 1792)                   | 81    | 5             | 41 | 3            | 1 | 3     | 19 | 1             | 8  | sap   |
|                      | <i>Hirticomus hispidus</i> (Rossi 1792)                   | 13    | 0             | 1  | 0            | 0 | 3     | 2  | 3             | 4  | sap   |
|                      | <i>Microhoria terminata</i> (W. L. E. Schmidt 1842)       | 12    | 0             | 0  | 0            | 0 | 0     | 2  | 2             | 8  | sap   |
| <b>Aphodiidae</b>    | <i>Acrossus luridus</i> (Fabricius 1775)                  | 1     | 0             | 0  | 0            | 0 | 0     | 0  | 1             | 0  | cop   |
|                      | <i>Ammoecius elevatus</i> (Olivier 1789)                  | 1     | 0             | 0  | 0            | 0 | 0     | 0  | 1             | 0  | cop   |
|                      | <i>Bodilus ictericus ghardimaouensis</i> (Balthasar 1929) | 1     | 1             | 0  | 0            | 0 | 0     | 0  | 0             | 0  | cop   |
|                      | <i>Calamosternus granarius</i> (Linnaeus 1767)            | 1     | 0             | 0  | 0            | 0 | 0     | 0  | 1             | 0  | cop   |
|                      | <i>Eudolus quadriguttatus</i> (Herbst 1783) °             | 1     | 0             | 0  | 0            | 0 | 0     | 0  | 1             | 0  | cop   |
|                      | <i>Pleurophorus caesus</i> (Creutzer 1796)                | 4     | 0             | 1  | 0            | 0 | 0     | 1  | 0             | 2  | cop   |
| <b>Apionidae</b>     | <i>Protapion difforme</i> (Germar 1818)                   | 1     | 0             | 1  | 0            | 0 | 0     | 0  | 0             | 0  | phy   |
|                      | <i>Protapion interjectum</i> (Desbrochers 1895)           | 10    | 6             | 0  | 1            | 0 | 2     | 1  | 0             | 0  | phy   |
| <b>Brachyceridae</b> | <i>Brachycerus muricatus</i> Olivier 1790                 | 7     | 0             | 0  | 3            | 0 | 1     | 1  | 0             | 2  | phy   |
| <b>Buprestidae</b>   | <i>Anthaxia cyanescens</i> Gory 1841 °                    | 2     | 0             | 0  | 1            | 0 | 0     | 0  | 0             | 1  | phy   |
|                      | <i>Cylindromorphus parallelus</i> Fairmaire 1859 °        | 3     | 0             | 0  | 0            | 0 | 1     | 2  | 0             | 0  | phy   |
|                      | <i>Habroloma triangulare</i> (Lacordaire 1835) °          | 1     | 0             | 0  | 0            | 0 | 0     | 0  | 0             | 1  | phy   |
|                      | <i>Sphenoptera gemmata</i> (Olivier 1790) °               | 12    | 1             | 4  | 0            | 0 | 1     | 1  | 3             | 2  | phy   |
|                      | <i>Trachys goberti</i> Gozis 1889 °                       | 1     | 0             | 0  | 0            | 0 | 0     | 0  | 1             | 0  | phy   |
|                      | <i>Trachys troglodytes</i> Gyllenhal 1817                 | 3     | 0             | 0  | 0            | 0 | 0     | 0  | 2             | 1  | phy   |

|                     |                                                         |      |     |     |     |      |     |    |    |    |     |
|---------------------|---------------------------------------------------------|------|-----|-----|-----|------|-----|----|----|----|-----|
| <b>Byrrhidae</b>    | <i>Curimopsis maritima</i> (Marsham 1802)               | 11   | 0   | 1   | 0   | 0    | 0   | 2  | 7  | 1  | sap |
| <b>Cantharidae</b>  | <i>Malthodes</i> sp.                                    | 4    | 3   | 0   | 1   | 0    | 0   | 0  | 0  | 0  | phy |
|                     | <i>Malthodes</i> sp.2                                   | 4    | 2   | 0   | 0   | 0    | 1   | 1  | 0  | 0  | phy |
|                     | <i>Rhagonycha fulva</i> (Scopoli 1763)                  | 1    | 0   | 0   | 0   | 0    | 1   | 0  | 0  | 0  | phy |
| <b>Carabidae</b>    | <i>Acinopus picipes</i> (Olivier 1795)                  | 96   | 5   | 6   | 44  | 37   | 1   | 0  | 1  | 2  | phy |
|                     | <i>Amara equestris</i> (Duftschmid 1812)                | 7    | 2   | 2   | 2   | 1    | 0   | 0  | 0  | 0  | prd |
|                     | <i>Amara eurynota</i> (Panzer 1797)                     | 1    | 0   | 1   | 0   | 0    | 0   | 0  | 0  | 0  | prd |
|                     | <i>Brachinus exhalans</i> (P. Rossi 1792)               | 1    | 0   | 1   | 0   | 0    | 0   | 0  | 0  | 0  | prd |
|                     | <i>Calathus cinctus</i> Motschulsky 1850                | 1    | 0   | 1   | 0   | 0    | 0   | 0  | 0  | 0  | prd |
|                     | <i>Calathus fuscipes</i> (Goeze 1777)                   | 3    | 0   | 0   | 0   | 0    | 0   | 0  | 0  | 3  | prd |
|                     | <i>Calosoma maderae</i> (Fabricius 1775) °              | 1    | 0   | 1   | 0   | 0    | 0   | 0  | 0  | 0  | prd |
|                     | <i>Carabus coriaceus</i> Linnaeus 1758                  | 40   | 0   | 1   | 0   | 0    | 0   | 0  | 8  | 31 | prd |
|                     | <i>Carterus</i> cf. <i>fulvipes</i> (Latreille 1817)    | 1    | 0   | 0   | 0   | 0    | 0   | 0  | 0  | 1  | prd |
|                     | <i>Cicindela maroccana</i> Fabricius 1801               | 32   | 1   | 0   | 14  | 4    | 7   | 6  | 0  | 0  | prd |
|                     | <i>Dinodes decipens</i> (L. Dufour 1820) °              | 2    | 0   | 0   | 0   | 1    | 0   | 0  | 1  | 0  | prd |
|                     | <i>Dixus sphaerocephalus</i> (Olivier 1795)             | 3    | 0   | 3   | 0   | 0    | 0   | 0  | 0  | 0  | prd |
|                     | <i>Harpalus affinis</i> (Schrank 1781)                  | 1    | 0   | 0   | 0   | 0    | 0   | 1  | 0  | 0  | prd |
|                     | <i>Harpalus distinguendus</i> (Duftschmid 1812)         | 1    | 0   | 0   | 0   | 0    | 0   | 0  | 0  | 1  | prd |
|                     | <i>Harpalus sulphuripes</i> Germar 1824                 | 16   | 0   | 0   | 1   | 1    | 11  | 2  | 1  | 0  | prd |
|                     | <i>Licinus silphoides</i> (P. Rossi 1790)               | 1    | 0   | 1   | 0   | 0    | 0   | 0  | 0  | 0  | prd |
|                     | <i>Microlestes luctuosus</i> Holdhaus in Apfelbeck 1904 | 122  | 3   | 6   | 3   | 15   | 2   | 22 | 10 | 61 | prd |
|                     | <i>Nebria brevicollis</i> (Fabricius 1792)              | 1    | 0   | 0   | 0   | 0    | 0   | 0  | 1  | 0  | prd |
|                     | <i>Notiophilus substriatus</i> C.R. Waterhouse 1833     | 3    | 3   | 0   | 0   | 0    | 0   | 0  | 0  | 0  | prd |
|                     | <i>Olisthopus fuscatus</i> Dejean 1828                  | 1    | 0   | 0   | 1   | 0    | 0   | 0  | 0  | 0  | prd |
|                     | <i>Ophonus subquadratus</i> (Dejean 1829)               | 27   | 1   | 5   | 7   | 2    | 0   | 0  | 0  | 12 | prd |
|                     | <i>Phyla tethys</i> (Netolitzky 1926)                   | 1    | 0   | 0   | 0   | 0    | 0   | 1  | 0  | 0  | prd |
|                     | <i>Poecilus sericeus</i> Fischer von Waldheim 1824      | 2402 | 280 | 179 | 440 | 1070 | 387 | 46 | 0  | 0  | prd |
|                     | <i>Trechus quadristriatus</i> (Schrank 1781)            | 1    | 0   | 0   | 0   | 0    | 0   | 0  | 0  | 1  | prd |
|                     | <i>Zabrus ignavus</i> Csiki 1907 °                      | 13   | 1   | 12  | 0   | 0    | 0   | 0  | 0  | 0  | phy |
| <b>Cerambycidae</b> | <i>Agapanthia cardui</i> (Linnaeus 1767)                | 4    | 0   | 1   | 0   | 0    | 0   | 0  | 0  | 3  | phy |
|                     | <i>Calamobius filum</i> (Rossi 1790)                    | 8    | 0   | 1   | 0   | 0    | 0   | 2  | 0  | 5  | phy |
|                     | <i>Stenurella bifasciata</i> (Müller 1776)              | 1    | 0   | 0   | 0   | 0    | 0   | 1  | 0  | 0  | phy |

|                      |                                                     |     |    |     |   |    |    |     |    |    |     |
|----------------------|-----------------------------------------------------|-----|----|-----|---|----|----|-----|----|----|-----|
|                      | <i>Vesperus luridus</i> (Rossi 1794) °              | 6   | 0  | 2   | 0 | 0  | 1  | 3   | 0  | 0  | phy |
| <b>Cetoniidae</b>    | <i>Protaetia morio</i> (Fabricius 1781)             | 13  | 0  | 0   | 3 | 0  | 2  | 0   | 8  | 0  | phy |
|                      | <i>Protaetia oblonga</i> (Gory & Percheron 1833)    | 195 | 81 | 98  | 4 | 0  | 7  | 1   | 4  | 0  | phy |
|                      | <i>Tropinota squalida</i> (Scopoli 1783)            | 6   | 0  | 0   | 0 | 1  | 1  | 2   | 0  | 2  | phy |
| <b>Chrysomelidae</b> | <i>Aphthona euphorbiae</i> (Schrank 1781)           | 317 | 3  | 7   | 4 | 27 | 8  | 151 | 92 | 25 | phy |
|                      | <i>Aphthona nigriceps</i> (Redtenbacher 1842)       | 11  | 0  | 3   | 0 | 0  | 0  | 0   | 5  | 4  | phy |
|                      | <i>Bruchidius bimaculatus</i> (Olivier 1795)        | 212 | 46 | 131 | 4 | 7  | 11 | 8   | 1  | 4  | phy |
|                      | <i>Bruchidius foveolatus</i> (Gyllenhal 1833)       | 73  | 15 | 32  | 0 | 6  | 14 | 5   | 1  | 0  | phy |
|                      | <i>Cassida deflorata</i> Suffrian 1844              | 2   | 0  | 0   | 0 | 0  | 0  | 0   | 0  | 2  | phy |
|                      | <i>Chaetocnema hortensis</i> (Geoffroy 1785)        | 4   | 0  | 0   | 0 | 0  | 0  | 0   | 3  | 1  | phy |
|                      | <i>Chrysolina femoralis</i> (Olivier 1790)          | 3   | 2  | 1   | 0 | 0  | 0  | 0   | 0  | 0  | phy |
|                      | <i>Chrysolina bankii</i> (Fabricius 1775)           | 3   | 0  | 0   | 0 | 0  | 0  | 1   | 0  | 2  | phy |
|                      | <i>Cryptocephalus crassus</i> G. A. Olivier 1791    | 3   | 0  | 0   | 0 | 0  | 0  | 0   | 1  | 2  | phy |
|                      | <i>Cryptocephalus rugicollis</i> G. A. Olivier 1791 | 8   | 0  | 0   | 0 | 0  | 0  | 3   | 5  | 0  | phy |
|                      | <i>Dibolia cryptocephala</i> (Koch 1803)            | 16  | 1  | 7   | 0 | 0  | 2  | 1   | 1  | 4  | phy |
|                      | <i>Dibolia cynoglossi</i> (Koch 1803)               | 2   | 0  | 0   | 0 | 0  | 1  | 0   | 1  | 0  | phy |
|                      | <i>Gastrophysa polygoni</i> (Linnaeus 1758)         | 2   | 0  | 0   | 0 | 0  | 1  | 0   | 0  | 1  | phy |
|                      | <i>Hispa atra</i> Linnaeus 1767                     | 4   | 1  | 1   | 0 | 0  | 0  | 0   | 2  | 0  | phy |
|                      | <i>Hypocassida subferruginea</i> (Schrank 1776)     | 1   | 0  | 0   | 0 | 0  | 0  | 0   | 0  | 1  | phy |
|                      | <i>Longitarsus obliteratoides</i> Gruev 1973        | 17  | 0  | 0   | 0 | 2  | 0  | 0   | 11 | 4  | phy |
|                      | <i>Longitarsus succineus</i> (Foudras 1860)         | 327 | 52 | 61  | 5 | 12 | 32 | 63  | 78 | 24 | phy |
|                      | <i>Phyllotreta atra</i> (Fabricius 1775)            | 1   | 0  | 0   | 0 | 0  | 1  | 0   | 0  | 0  | phy |
|                      | <i>Psylliodes chrysocephala</i> (Linnaeus 1758)     | 1   | 0  | 0   | 0 | 0  | 0  | 0   | 1  | 0  | phy |
|                      | <i>Spermophagus sericeus</i> (Geoffroy 1785)        | 32  | 0  | 0   | 0 | 0  | 3  | 2   | 1  | 26 | phy |
|                      | <i>Sphaeroderma rubidum</i> (Graëlls 1858)          | 31  | 0  | 0   | 0 | 0  | 0  | 0   | 3  | 28 | phy |
|                      | <i>Timarcha tenebricosa</i> (Fabricius 1775)        | 1   | 0  | 0   | 0 | 0  | 1  | 0   | 0  | 0  | phy |
| <b>Coccinellidae</b> | <i>Coccinella septempunctata</i> Linnaeus 1758      | 24  | 3  | 11  | 0 | 0  | 0  | 2   | 8  | 0  | prd |
|                      | <i>Exochomus nigromaculatus</i> (Goeze 1777)        | 2   | 0  | 0   | 0 | 0  | 1  | 0   | 1  | 0  | prd |
|                      | <i>Hyperaspis reppensis</i> (Herbst 1783)           | 1   | 0  | 0   | 0 | 0  | 0  | 0   | 1  | 0  | prd |
|                      | <i>Olibrus affinis</i> (Sturm 1807)                 | 2   | 0  | 0   | 0 | 0  | 0  | 2   | 0  | 0  | prd |
|                      | <i>Rhyzobius litura</i> (Fabricius 1787)            | 2   | 0  | 0   | 0 | 0  | 0  | 0   | 0  | 2  | prd |
|                      | <i>Scymnus frontalis</i> (Fabricius 1787)           | 10  | 2  | 3   | 1 | 0  | 0  | 2   | 2  | 0  | prd |

|                       |                                                           |            |     |    |    |    |    |   |    |   |     |
|-----------------------|-----------------------------------------------------------|------------|-----|----|----|----|----|---|----|---|-----|
|                       | <i>Scymnus mediterraneus</i> lablokoff-Khnzorian 1972     | <b>9</b>   | 0   | 0  | 0  | 0  | 6  | 0 | 2  | 1 | prd |
|                       | <i>Scymnus</i> sp.                                        | <b>3</b>   | 0   | 1  | 0  | 0  | 1  | 0 | 0  | 1 | sap |
| <b>Colonidae</b>      | <i>Colon</i> sp.                                          | <b>1</b>   | 0   | 0  | 0  | 1  | 0  | 0 | 0  | 0 | sap |
| <b>Corylophidae</b>   | <i>Arthrolips convexiuscula</i> (Motschulsky 1849)        | <b>3</b>   | 3   | 0  | 0  | 0  | 0  | 0 | 0  | 0 | sap |
|                       | <i>Arthrolips picea</i> (Comolli 1837)                    | <b>20</b>  | 1   | 13 | 0  | 0  | 1  | 0 | 3  | 2 | sap |
|                       | <i>Sericoderus lateralis</i> (Gyllenhal 1827)             | <b>2</b>   | 0   | 2  | 0  | 0  | 0  | 0 | 0  | 0 | sap |
| <b>Cryptophagidae</b> | <i>Hypocopus latridioides</i> (Motschulsky 1839) °        | <b>1</b>   | 0   | 0  | 0  | 0  | 0  | 0 | 1  | 0 | sap |
| <b>Cucujidae</b>      | <i>Oryzaephilus surinamensis</i> (Linnaeus 1758)          | <b>7</b>   | 1   | 0  | 0  | 0  | 1  | 1 | 1  | 3 | sap |
| <b>Curculionidae</b>  | <i>Ceutorhynchus leprieuri</i> C. Brisout 1881            | <b>1</b>   | 0   | 0  | 0  | 0  | 0  | 0 | 0  | 1 | phy |
|                       | <i>Cionus olivieri</i> Rosenschöld 1838                   | <b>1</b>   | 0   | 0  | 0  | 0  | 0  | 0 | 1  | 0 | phy |
|                       | <i>Coniocleonus excoriatus</i> (Gyllenhal 1834) °         | <b>1</b>   | 0   | 0  | 0  | 0  | 0  | 0 | 1  | 0 | phy |
|                       | <i>Coniocleonus nigrosuturatus</i> (Goeze 1777)           | <b>506</b> | 259 | 72 | 71 | 16 | 47 | 9 | 29 | 3 | phy |
|                       | <i>Cycloderes canescens</i> (Rossi 1792)                  | <b>6</b>   | 5   | 0  | 0  | 1  | 0  | 0 | 0  | 0 | phy |
|                       | <i>Cycloderes guinardi</i> (Jacquelin du Val 1852) °      | <b>22</b>  | 4   | 0  | 0  | 0  | 3  | 3 | 12 | 0 | phy |
|                       | <i>Donus crinitus</i> (Boheman 1834)                      | <b>10</b>  | 3   | 4  | 2  | 0  | 0  | 0 | 1  | 0 | phy |
|                       | <i>Entomoderus impressicollis colasi</i> (Roudier 1954) ° | <b>1</b>   | 1   | 0  | 0  | 0  | 0  | 0 | 0  | 0 | phy |
|                       | <i>Gronops lunatus</i> (Fabricius 1775) °                 | <b>1</b>   | 1   | 0  | 0  | 0  | 0  | 0 | 0  | 0 | phy |
|                       | <i>Hadroplontus trimaculatus</i> (Fabricius 1775)         | <b>4</b>   | 0   | 0  | 0  | 0  | 0  | 0 | 0  | 4 | phy |
|                       | <i>Hypera dauci</i> (Olivier 1807)                        | <b>39</b>  | 22  | 3  | 1  | 4  | 3  | 1 | 4  | 1 | phy |
|                       | <i>Hypera melancholica</i> (Fabricius 1792)               | <b>1</b>   | 0   | 0  | 0  | 0  | 0  | 0 | 1  | 0 | phy |
|                       | <i>Hypurus bertrandi</i> (Perris 1852)                    | <b>2</b>   | 0   | 0  | 0  | 0  | 0  | 1 | 1  | 0 | phy |
|                       | <i>Larinus ursus</i> (Fabricius 1792)                     | <b>2</b>   | 0   | 1  | 1  | 0  | 0  | 0 | 0  | 0 | phy |
|                       | <i>Limobius borealis</i> (Paykull 1792)                   | <b>7</b>   | 0   | 2  | 2  | 0  | 2  | 1 | 0  | 0 | phy |
|                       | <i>Lixus filiformis</i> (Fabricius 1781)                  | <b>1</b>   | 0   | 0  | 0  | 0  | 0  | 0 | 1  | 0 | phy |
|                       | <i>Lixus</i> sp.                                          | <b>1</b>   | 0   | 0  | 0  | 0  | 0  | 0 | 0  | 1 | phy |
|                       | <i>Lixus vilis</i> (Rossi 1790)                           | <b>3</b>   | 0   | 0  | 1  | 0  | 0  | 0 | 2  | 0 | phy |
|                       | <i>Mecinus dorsalis</i> Aubé 1850                         | <b>1</b>   | 0   | 0  | 0  | 0  | 1  | 0 | 0  | 0 | phy |
|                       | <i>Mecinus labilis</i> (Herbst 1795)                      | <b>1</b>   | 0   | 0  | 0  | 0  | 0  | 0 | 0  | 1 | phy |
|                       | <i>Otiorrhynchus vitellus</i> Gyllenhal 1834              | <b>23</b>  | 5   | 3  | 7  | 2  | 4  | 1 | 1  | 0 | phy |
|                       | <i>Phridiuchus spilmani</i> Warner 1969 °                 | <b>10</b>  | 5   | 5  | 0  | 0  | 0  | 0 | 0  | 0 | phy |
|                       | <i>Pleurodirus aquisextanus</i> (Abeille 1904) °          | <b>5</b>   | 0   | 0  | 0  | 0  | 2  | 1 | 0  | 2 | phy |
|                       | <i>Pseudocleonus cinereus</i> (Schrank 1781)              | <b>34</b>  | 20  | 11 | 0  | 1  | 1  | 1 | 0  | 0 | phy |



|                       |                                                      |     |    |    |   |    |   |   |    |     |     |
|-----------------------|------------------------------------------------------|-----|----|----|---|----|---|---|----|-----|-----|
|                       | <i>Saprinus semistriatus</i> (Scriba 1790)           | 3   | 0  | 0  | 1 | 2  | 0 | 0 | 0  | 0   | sap |
| <b>Lathridiidae</b>   | <i>Cholovocera formicaria</i> (Motschulsky 1838) °   | 10  | 0  | 3  | 0 | 1  | 2 | 0 | 3  | 1   | sap |
|                       | <i>Melanophthalma fuscipennis</i> (Mannerheim 1844)  | 25  | 0  | 3  | 0 | 0  | 0 | 1 | 0  | 21  | sap |
|                       | <i>Migneauxia crassiuscula</i> (Aubé 1850)           | 1   | 0  | 0  | 0 | 0  | 0 | 1 | 0  | 0   | sap |
| <b>Leioididae</b>     | <i>Agathidium haemorrhoum</i> Erichson 1845          | 9   | 0  | 1  | 0 | 1  | 1 | 1 | 0  | 5   | sap |
|                       | <i>Ptomaphagus sericatus</i> (Chaudoir 1845)         | 126 | 11 | 3  | 8 | 11 | 2 | 6 | 82 | 3   | sap |
|                       | <i>Ptomaphagus subvillosus</i> (Goeze 1777)          | 10  | 0  | 0  | 0 | 1  | 0 | 1 | 6  | 2   | sap |
| <b>Malachiidae</b>    | <i>Charopus docilis</i> Kiesenwetter 1851            | 198 | 0  | 0  | 0 | 1  | 0 | 0 | 7  | 190 | prd |
|                       | <i>Clanoptilus spinosus</i> (Erichson 1840)          | 1   | 0  | 0  | 0 | 0  | 0 | 1 | 0  | 0   | prd |
|                       | <i>Colotes punctatus</i> (Erichson 1840)             | 1   | 0  | 0  | 0 | 0  | 0 | 0 | 0  | 1   | prd |
|                       | <i>Cyrtosus cyanipennis</i> (Erichson 1840)          | 4   | 0  | 1  | 0 | 0  | 1 | 1 | 1  | 0   | prd |
|                       | <i>Pelochrus pallidulus</i> (Erichson 1840) °        | 1   | 0  | 0  | 0 | 0  | 1 | 0 | 0  | 0   | prd |
| <b>Meloidae</b>       | <i>Hycleus duodecimpunctatus</i> (Olivier 1811)      | 11  | 5  | 1  | 1 | 0  | 3 | 1 | 0  | 0   | phy |
|                       | <i>Mylabris quadripunctata</i> (Linnaeus 1767)       | 2   | 1  | 0  | 0 | 0  | 0 | 0 | 1  | 0   | phy |
|                       | <i>Mylabris variabilis</i> (Pallas 1781)             | 15  | 1  | 0  | 0 | 13 | 0 | 1 | 0  | 0   | phy |
| <b>Melolonthidae</b>  | <i>Amphimallon ruficorne</i> (Fabricius 1775) °      | 13  | 2  | 1  | 2 | 2  | 4 | 2 | 0  | 0   | phy |
|                       | <i>Rhizotrogus cicatricosus</i> Mulsant 1842 °       | 40  | 15 | 14 | 3 | 1  | 4 | 1 | 2  | 0   | phy |
| <b>Mordellidae</b>    | Mordellidae (G. sp.)                                 | 19  | 0  | 0  | 1 | 0  | 4 | 1 | 11 | 2   | phy |
|                       | Mordellidae (G. sp.)2                                | 2   | 0  | 1  | 0 | 0  | 0 | 0 | 0  | 1   | phy |
| <b>Mycetophagidae</b> | <i>Typhaea stercorea</i> (Linnaeus 1758)             | 4   | 0  | 0  | 0 | 3  | 1 | 0 | 0  | 0   | phy |
| <b>Nitidulinae</b>    | <i>Meligethes</i> sp.                                | 4   | 0  | 2  | 0 | 0  | 0 | 0 | 0  | 2   | phy |
| <b>Oedemeridae</b>    | <i>Oedemera flavipes</i> (Fabricius 1792)            | 2   | 0  | 0  | 0 | 0  | 0 | 0 | 2  | 0   | phy |
|                       | <i>Oedemera crassipes</i> Ganglbauer 1881 °          | 26  | 0  | 20 | 0 | 0  | 0 | 0 | 1  | 5   | phy |
| <b>Phalacridae</b>    | <i>Olibrus bicolor</i> (Fabricius 1792)              | 1   | 0  | 1  | 0 | 0  | 0 | 0 | 0  | 0   | phy |
| <b>Pselaphidae</b>    | <i>Brachygluta perforata</i> (Aubé 1833)             | 2   | 0  | 0  | 0 | 1  | 0 | 0 | 0  | 1   | sap |
|                       | <i>Brachygluta tibialis</i> (Aubé 1844)              | 6   | 1  | 0  | 0 | 3  | 0 | 0 | 0  | 2   | sap |
| <b>Scarabaeidae</b>   | <i>Euoniticellus fulvus</i> (Goeze 1777)             | 1   | 0  | 0  | 0 | 0  | 0 | 0 | 1  | 0   | cop |
|                       | <i>Onthophagus emarginatus</i> Mulsant & Godart 1842 | 1   | 0  | 0  | 0 | 0  | 0 | 0 | 1  | 0   | cop |
|                       | <i>Onthophagus furcatus</i> (Fabricius 1781)         | 22  | 0  | 0  | 0 | 0  | 0 | 0 | 22 | 0   | cop |
|                       | <i>Onthophagus maki</i> (Illiger 1803)               | 1   | 0  | 0  | 0 | 0  | 0 | 0 | 1  | 0   | cop |
|                       | <i>Onthophagus ruficapillus</i> Brullé 1832          | 3   | 0  | 0  | 0 | 0  | 0 | 0 | 2  | 1   | cop |
|                       | <i>Onthophagus vacca</i> (Linnaeus 1767)             | 9   | 2  | 0  | 0 | 0  | 1 | 0 | 6  | 0   | cop |

|                      |                                                          |     |    |    |   |    |    |    |    |    |     |
|----------------------|----------------------------------------------------------|-----|----|----|---|----|----|----|----|----|-----|
|                      | <i>Scarabaeus laticollis</i> Linnaeus 1767               | 2   | 0  | 0  | 0 | 0  | 2  | 0  | 0  | 0  | cop |
| <b>Scraptiidae</b>   | <i>Scraptia dubia</i> Olivier 1790                       | 9   | 0  | 0  | 0 | 0  | 0  | 0  | 7  | 2  | sap |
| <b>Scydmaenidae</b>  | <i>Euconnus chrysocomus</i> (Saulcy 1864) °              | 3   | 0  | 1  | 0 | 0  | 0  | 0  | 1  | 1  | sap |
|                      | <i>Stenichnus</i> cf. <i>helferi</i> (Schaum 1841)       | 6   | 0  | 0  | 2 | 0  | 2  | 0  | 2  | 0  | sap |
| <b>Silphidae</b>     | <i>Ablattaria laevigata</i> (Fabricius 1775)             | 1   | 0  | 0  | 0 | 0  | 0  | 0  | 0  | 1  | sap |
|                      | <i>Thanatophilus sinuatus</i> (Fabricius 1775)           | 1   | 0  | 0  | 0 | 0  | 0  | 0  | 0  | 1  | sap |
| <b>Silvanidae</b>    | <i>Ahasverus advena</i> (Waltl 1834)                     | 1   | 0  | 0  | 0 | 1  | 0  | 0  | 0  | 0  | sap |
| <b>Staphylinidae</b> | <i>Aleochara bipustulata</i> (Linnaeus, 1761)            | 3   | 0  | 0  | 0 | 0  | 0  | 0  | 3  | 0  | prd |
|                      | Aleocharinae (G.sp.)1                                    | 8   | 0  | 0  | 0 | 0  | 0  | 0  | 0  | 8  | prd |
|                      | Aleocharinae (G.sp.)2                                    | 2   | 0  | 0  | 1 | 0  | 0  | 0  | 1  | 0  | prd |
|                      | <i>Aloconota</i> sp.                                     | 1   | 0  | 0  | 0 | 1  | 0  | 0  | 0  | 0  | prd |
|                      | <i>Anotylus inustus</i> (Gravenhorst 1806)               | 83  | 5  | 0  | 0 | 3  | 1  | 2  | 70 | 2  | prd |
|                      | <i>Astenus anguinus</i> (Baudi 1848)                     | 18  | 0  | 1  | 0 | 0  | 0  | 3  | 11 | 3  | prd |
|                      | <i>Astrapaeus ulmi</i> (Rossi 1790) °                    | 2   | 0  | 0  | 0 | 0  | 0  | 0  | 0  | 2  | prd |
|                      | <i>Atheta</i> sp.1                                       | 30  | 21 | 3  | 3 | 0  | 0  | 0  | 2  | 1  | prd |
|                      | <i>Bolitobius castaneus</i> (Stephens 1832)              | 5   | 0  | 0  | 0 | 0  | 0  | 0  | 1  | 4  | prd |
|                      | <i>Ocypus fortunatarum</i> Wollaston 1871                | 2   | 0  | 0  | 0 | 0  | 0  | 2  | 0  | 0  | prd |
|                      | <i>Ocypus obsкуроaeneus schatzmayri</i> (J. Müller 1923) | 49  | 7  | 5  | 4 | 12 | 6  | 7  | 4  | 4  | prd |
|                      | <i>Ocypus olens</i> (O. Müller 1764)                     | 3   | 1  | 2  | 0 | 0  | 0  | 0  | 0  | 0  | prd |
|                      | <i>Ocypus ophthalmicus</i> (Scopoli 1763)                | 107 | 1  | 7  | 3 | 15 | 4  | 7  | 27 | 43 | prd |
|                      | <i>Oligota pumilio</i> Kiesenwetter 1858                 | 7   | 1  | 1  | 0 | 0  | 2  | 2  | 0  | 1  | prd |
|                      | <i>Othius lapidicola</i> Märkel & Kiesenwetter 1848      | 2   | 0  | 0  | 0 | 0  | 0  | 0  | 0  | 2  | prd |
|                      | <i>Oxypoda</i> sp.                                       | 3   | 0  | 1  | 0 | 0  | 0  | 2  | 0  | 0  | prd |
|                      | <i>Paederus fuscipes</i> Curtis 1826                     | 1   | 0  | 0  | 0 | 0  | 0  | 0  | 0  | 1  | prd |
|                      | <i>Quedius semiobscurus</i> (Marsham 1802)               | 10  | 0  | 3  | 0 | 0  | 0  | 1  | 2  | 4  | prd |
|                      | <i>Quedius tristis</i> (Gravenhorst 1802)                | 4   | 0  | 2  | 0 | 0  | 0  | 0  | 0  | 2  | prd |
|                      | <i>Sepedophilus immaculatus</i> (Stephens 1832)          | 160 | 2  | 13 | 1 | 18 | 7  | 47 | 23 | 49 | prd |
|                      | <i>Stenus elegans</i> Rosenhauer 1856                    | 1   | 0  | 0  | 0 | 0  | 0  | 0  | 1  | 0  | prd |
|                      | <i>Tachyporus hypnorum</i> (Fabricius 1775)              | 1   | 0  | 0  | 0 | 0  | 0  | 1  | 0  | 0  | prd |
|                      | <i>Tachyporus nitidulus</i> (Fabricius 1781)             | 127 | 1  | 55 | 2 | 15 | 10 | 34 | 2  | 8  | prd |
|                      | <i>Tasgius pedator</i> (Gravenhorst 1802)                | 18  | 0  | 0  | 0 | 2  | 1  | 0  | 0  | 15 | prd |
|                      | <i>Trogloloeus</i> sp.                                   | 1   | 0  | 0  | 0 | 0  | 1  | 0  | 0  | 0  | prd |

|                      |                                              |             |             |             |            |             |            |            |            |            |     |
|----------------------|----------------------------------------------|-------------|-------------|-------------|------------|-------------|------------|------------|------------|------------|-----|
|                      | <i>Xantholinus elegans</i> (Olivier 1795)    | 19          | 1           | 10          | 2          | 3           | 1          | 0          | 2          | 0          | prd |
|                      | <i>Xantholinus linearis</i> (Olivier 1795)   | 2           | 2           | 0           | 0          | 0           | 0          | 0          | 0          | 0          | prd |
| <b>Tenebrionidae</b> | <i>Asida sericea</i> (Olivier 1795)          | 864         | 310         | 158         | 104        | 46          | 139        | 34         | 72         | 1          | sap |
|                      | <i>Bioplanes meridionalis</i> Mulsant 1854   | 71          | 2           | 3           | 1          | 41          | 15         | 3          | 5          | 1          | sap |
|                      | <i>Omophlus lepturoides</i> (Fabricius 1787) | 4           | 2           | 1           | 0          | 1           | 0          | 0          | 0          | 0          | sap |
|                      | <i>Scaurus atratus</i> Fabricius 1775        | 20          | 11          | 4           | 0          | 1           | 3          | 1          | 0          | 0          | sap |
|                      | <b>TOTAL ABUNDANCE</b>                       | <b>7533</b> | <b>1290</b> | <b>1110</b> | <b>792</b> | <b>1424</b> | <b>823</b> | <b>572</b> | <b>782</b> | <b>746</b> |     |
|                      | <b>TOTAL RICHNESS</b>                        | <b>221</b>  | <b>71</b>   | <b>84</b>   | <b>50</b>  | <b>53</b>   | <b>75</b>  | <b>78</b>  | <b>104</b> | <b>98</b>  |     |
